# Supplementary material for: Cubic time algorithms of amalgamating gene trees and building evolutionary scenarios
Source: PubMed Central journal article supplement (PMC3577452; doi:10.1186/1745-6150-7-48), 2012-12-22

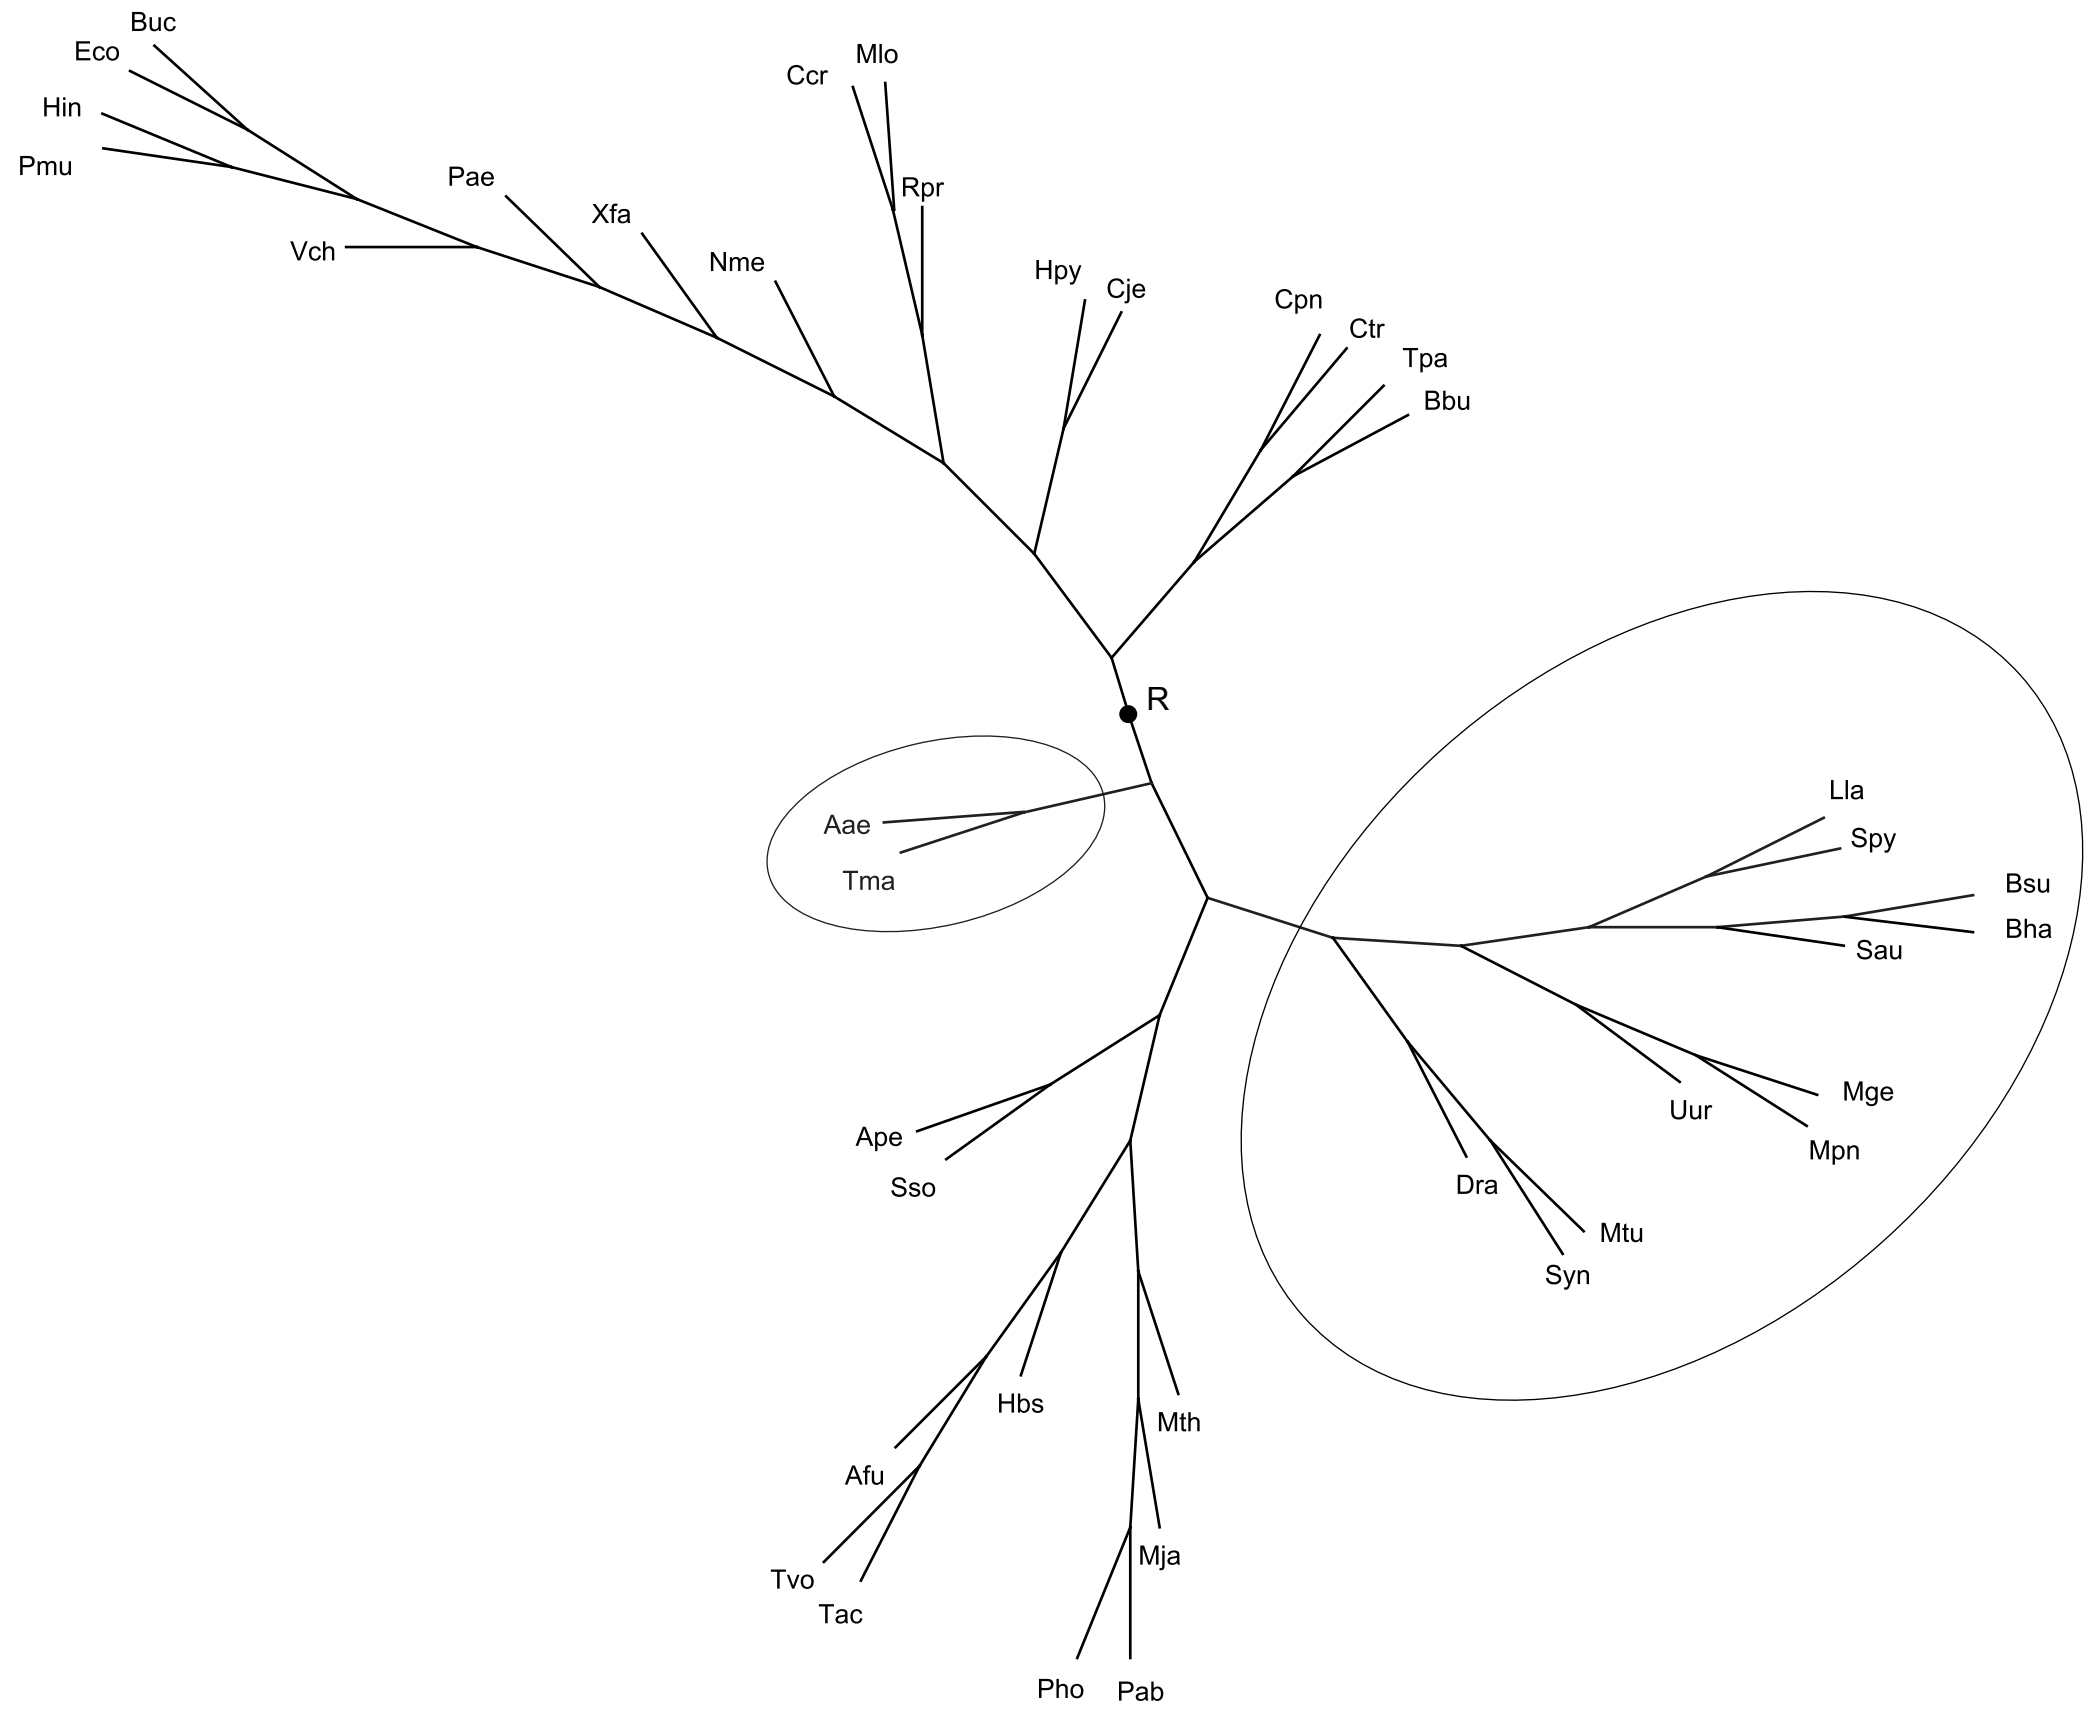

Supplement: 1745-6150-7-48-S5.pdf [file 1745-6150-7-48-S5.pdf]
